# Supplementary material for: Formation of fibrils derived from whey protein isolate: structural characteristics and protease resistance
Source: Royal Society of Chemistry journal article supplement (doi:10.1039/c9fo00961b), 2019-01-01
Supplement: c9fo00961b2.pdf [file c9fo00961b2.pdf]

1                                    **SUPPORTING INFORMATION**

2   **Formation of fibrils derived from whey protein isolate:**

3   **Structural characteristics and protease resistance**

#### 4 Supporting figures

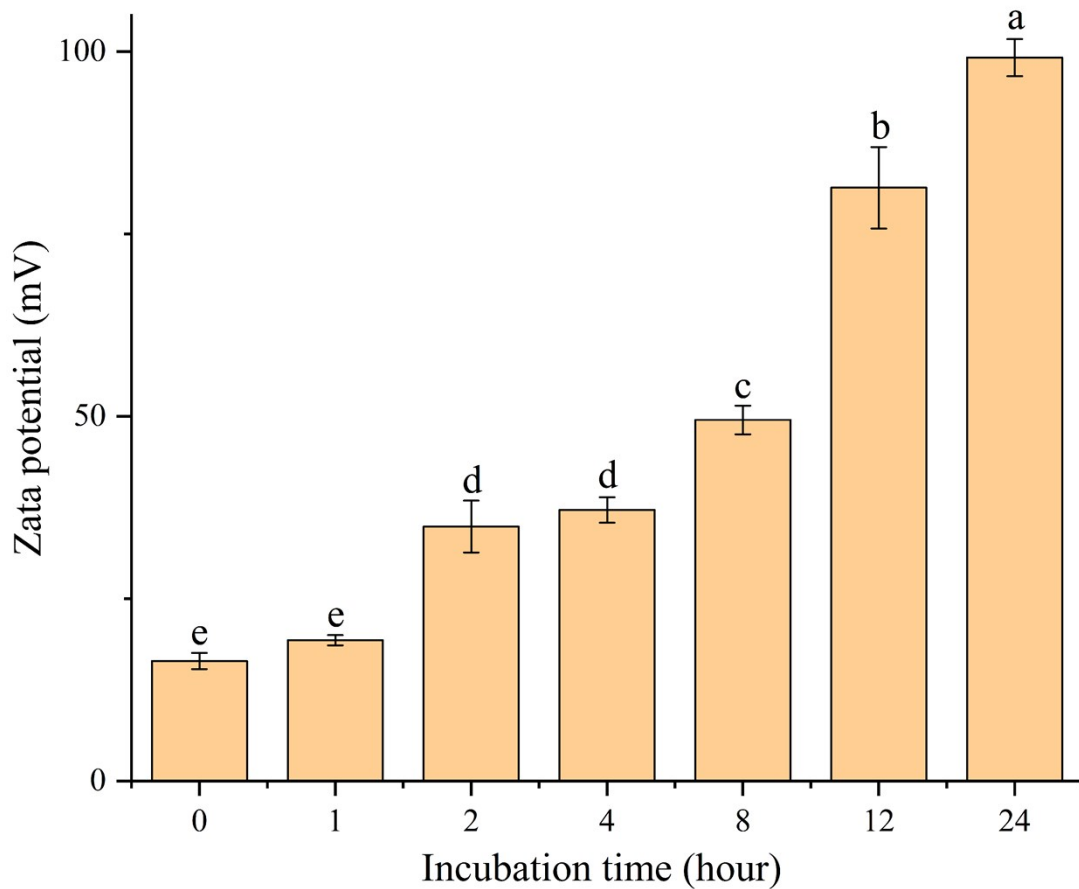

5

6 **Figure S1** Zeta- potential values of WPI heated at 80 °C under pH 2.0 for 0, 1, 2, 4, 8,  
7 12, and 24 h, respectively. Different superscript letters (a ~ e) indicate significant  
8 differences at the  $p < 0.05$  level.

9 Note: The zeta-potential of protein samples was determined using a particle size  
10 potentiometer (Nano-ZSE, Malvern Corp., U.K.). Protein samples were diluted with  
11 deionized water which was adjusted to pH 2.0 previously.
